# Supplementary material for: Calvaria Bone Transcriptome in Mouse Models of Osteogenesis Imperfecta
Source: MDPI journal article supplement (doi:10.3390/ijms22105290), 2021-05-18
Supplement: s1 [file s1]

## Supplemental Figure 1

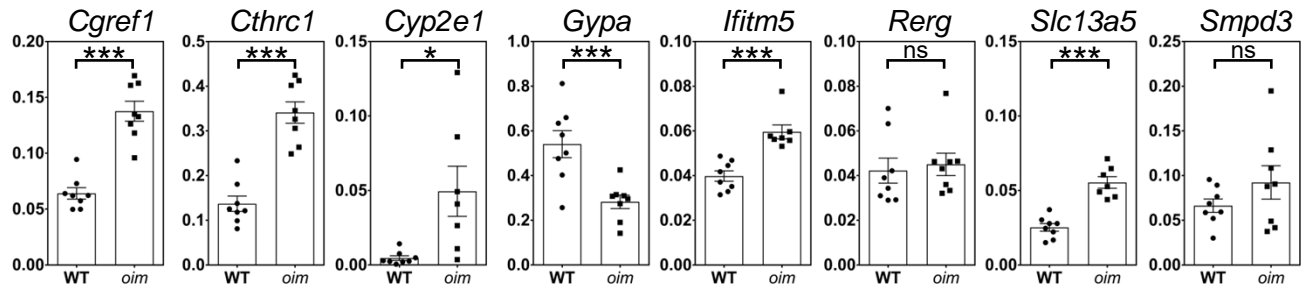

**Supplemental Figure 1.** Real-time PCR results in calvaria RNA of 10-week-old female *oim* mice. Values represent the  $2^{-\Delta Ct}$  normalized to *Rpl27*. Significant differences in gene expression compared to WT mice are indicated by asterisks (one-tailed unpaired t test): ns, non-significant, \*  $p < 0.05$ , \*\*\*  $p < 0.001$ . Error bars represent standard errors.
